# Supplementary material for: 11,12 and 14,15 epoxyeicosatrienoic acid rescue deteriorated wound healing in ischemia
Source: PLoS One. 2019 Jan 16;14(1):e0209158. doi: 10.1371/journal.pone.0209158 (PMC6335021; doi:10.1371/journal.pone.0209158)
Supplement: S1 Table — (XLSX) [file pone.0209158.s001.xlsx]

## Sheet: Tabelle1
	% of closed wound area
11,12 EET	D0	D2	D4	D6	D8	D10	D12	D14	D16		day of wound closure
	0	50.9171	57.8217	92.2356	100	100	100	100	100		8
	0	58.7857	80.0966	91.9035	100	100	100	100	100		8
	0	44.5132	93.9963	96.3544	100	100	100	100	100		8
	0	47.2165	77.472	92.4203	100	100	100	100	100		8
	0	65.529	92.9349	100	100	100	100	100	100		6
	0	57.676	91.2581	95.3165	96.9044	100	100	100	100		10
	0	79.514	91.896	100	100	100	100	100	100		6
	0	76.9276	92.8528	100	100	100	100	100	100		6
	0	56.3429	66.8687	91.3157	100	100	100	100	100		8
	0	71.7418	89.7684	92.205	100	100	100	100	100		8
mean value	0	60.9164	83.4966	95.1751	99.6904	100	100	100	100		7.6
standart deviation		12.1719	12.6515	3.68025	0.978925	0	0	0	0		1.26491
14,15 EET	% of closed wound area
	D0	D2	D4	D6	D8	D10	D12	D14	D16		day of wound closure
	0	54.0612	74.6728	87.2288	100	100	100	100	100		8
	0	61.1107	83.9847	91.0109	100	100	100	100	100		8
	0	79.8909	90.1699	94.8416	100	100	100	100	100		8
	0	49.8193	78.56	87.4986	96.1083	100	100	100	100		10
	0	60.2732	89.3494	91.3867	95.2759	100	100	100	100		10
	0	68.5909	84.9266	92.1221	94.4656	100	100	100	100		10
	0	61.63	84.5731	91.5207	100	100	100	100	100		8
	0	73.5189	89.1648	93.593	100	100	100	100	100		8
	0	52.0935	71.5662	87.8506	96.766	97.3139	100	100	100		12
	0	57.0168	85.621	91.0305	95.9061	100	100	100	100		10
mean value	0	61.8005	83.2588	90.8083	97.8522	99.7314	100	100	100		9.2
standart deviation		9.62686	6.34972	2.56461	2.33761	0.849433	0	0	0		1.39841
ischemia	% of closed wound area
	D0	D2	D4	D6	D8	D10	D12	D14	D16		day of wound closure
	0	70.2994	73.8833	79.6807	89.9932	93.9463	100	100	100		12
	0	57.6943	77.6987	86.2182	88.0189	94.8217	100	100	100		12
	0	33.9995	53.5751	74.3326	88.2356	94.9559	100	100	100		12
	0	56.8614	67.9278	73.1492	90.7682	95.1289	96.4933	100	100		14
	0	53.6038	70.6176	77.9193	90.6341	98.1963	100	100	100		12
	0	27.7485	63.2539	70.8105	85.638	90.9321	94.8692	97.5931	100		16
	0	45.3992	69.9187	84.4796	95.1136	97.0932	100	100	100		12
	0	71.7676	84.8216	88.6068	93.1961	100	100	100	100		10
	0	56.1283	85.6811	90.9789	91.5877	95.9464	98.4078	98.9186	100		16
	0	38.3927	65.3004	78.683	91.8527	97.1812	100	100	100		12
mean value	0	51.1895	71.2678	80.4859	90.5038	95.8202	98.977	99.6512	100		12.8
standart deviation		14.6652	9.80877	6.83659	2.72512	2.4996	1.84669	0.79901	0		1.93218
control	% of closed wound area
	0	2	4	6	8	10	12	14	16		day of wound closure
	0	46.4822	85.1444	92.3511	100	100	100	100	100		8
	0	60.4879	91.7639	95.8301	100	100	100	100	100		8
	0	61.9356	83.8899	91.173	100	100	100	100	100		8
	0	69.4586	82.9371	92.3615	100	100	100	100	100		8
	0	27.5396	51.6755	77.6644	100	100	100	100	100		8
	0	20.2296	91.8983	96.3498	100	100	100	100	100		8
	0	62.6223	91.6828	95.1272	100	100	100	100	100		8
	0	79.3933	92.8401	100	100	100	100	100	100		6
	0	60.0485	79.2342	93.3838	96.5777	100	100	100	100		10
	0	68.4833	71.8741	90.352	100	100	100	100	100		8
mean value	0	55.6681	82.294	92.4593	99.6578	100	100	100	100		8
standart deviation		18.7937	12.6834	5.92862	1.08222	0	0	0	0		0.942809
