# Supplementary material for: 11,12 and 14,15 epoxyeicosatrienoic acid rescue deteriorated wound healing in ischemia
Source: PLoS One. 2019 Jan 16;14(1):e0209158. doi: 10.1371/journal.pone.0209158 (PMC6335021; doi:10.1371/journal.pone.0209158)
Supplement: S2 Table — (XLSX) [file pone.0209158.s002.xlsx]

## Sheet: Tabelle1
VEGF
	d3	d6	d9
control	1.21	6.12	4.12				d3	d6	d9
	4.23	5.34	5.24		control	mean value	3.35875	4.905	4.36375
	3.42	3.23	4.95			standart deviation	1.11778	1.14907	0.737214
	4.12	6.25	4.37		ischemia	mean value	4.81625	5.6225	5.725
	4.34	5.14	3.35			standart deviation	0.813966	0.925199	0.953115
	3.15	3.36	5.15		11,12 EET	mean value	12.4975	13.5112	12.63
	2.27	5.41	4.36			standart deviation	1.44016	1.57768	1.47835
	4.13	4.39	3.37		14,15 EET	mean value	10.9638	11.6188	12.1687
ischemia	5.12	7.13	5.12			standart deviation	1.35315	1.34194	1.94002
	3.76	6.35	6.93
	5.34	5.21	7.13				d3	d6	d9
	4.23	4.75	5.24			1 to 2	p = 0.460773	p = 0.612577	p = 0.315556
	6.11	6.12	6.26			2 to 3	p = 0.003296	p =0.000858	p = 0.016687
	3.84	4.32	5.41			2 to 4	p = 0.068076	p = 0.031525	p = 0.032776
	5.24	5.16	5.32			1 to 3	p = 0.000033	p =0.000120	p = 0.000113
	4.89	5.94	4.39			1 to 4	p = 0.002527	p = 0.000155	p = 0.000379
11,12 EET	12.93	11.34	10.14			3 to 4	p = 0.460773	p = 0.460688	p = 0.749119
	10.34	12.16	11.23
	11.12	14.25	14.69
	12.43	13.43	12.27
	11.39	15.95	13.92
	13.38	12.32	13.37
	14.25	13.41	12.19
	14.14	15.23	13.23
14,15 EET	10.24	9.44	15.18
	12.87	11.23	14.34
	9.37	13.41	10.23
	10.93	12.26	12.14
	10.35	10.37	12.78
	12.14	11.87	11.41
	9.43	13.14	9.38
	12.38	11.23	11.89
