# Supplementary material for: 11,12 and 14,15 epoxyeicosatrienoic acid rescue deteriorated wound healing in ischemia
Source: PLoS One. 2019 Jan 16;14(1):e0209158. doi: 10.1371/journal.pone.0209158 (PMC6335021; doi:10.1371/journal.pone.0209158)
Supplement: S4 Table — (XLSX) [file pone.0209158.s004.xlsx]

## Sheet: Tabelle1
TNF-α
	d3	d6	d9
control	3.12	2.12	3.38				d3	d6	d9
	2.43	3.93	4.18		control	mean value	3.71857	3.6825	3.34625
	4.21	1.43	2.39			standart deviation	1.23846	1.34913	1.01307
	5.92	5.24	3.27		ischemia	mean value	3.92286	5.38286	4.8975
	2.38	4.43	2.03			standart deviation	0.711517	0.996539	1.35483
	3.39	3.12	2.41		11,12 EET	mean value	4.84375	6.13625	2.985
	4.36	4.28	4.42			standart deviation	1.92529	2.42463	1.29034
	3.34	4.91	4.69		14,15 EET	mean value	4.025	3.28375	4.0175
ischemia	5.07	5.95	6.78			standart deviation	1.3649	0.999027	1.21463
	4.13	7.21	5.12
	3.39	5.34	6.43				d3	d6	d9
	4.32	5.44	4.24			1 to 2	p=1.000000	p=0.081629	p=0.228074
	3.08	4.28	3.36			2 to 3	p=1.000000	p=1.000000	p=0.042659
	3.19	4.36	5.84			2 to 4	p=1.000000	p=0.021753	p=0.789032
	4.97	5.92	3.27			1 to 3	p= 0.695209	p=0.081629	p=0.789032
	4.38	5.13	4.14			1 to 4	p=1.000000	p=1.000000	p=0.789032
11,12 EET	5.13	6.36	2.14			3 to 4	p=1.000000	p=0.018569	p=0.463339
	4.24	7.28	1.12
	6.21	6.12	3.92
	3.23	8.23	2.34
	4.42	9.88	5.15
	8.87	4.89	2.23
	3.21	4.21	3.94
	3.44	2.12	3.04
14,15 EET	5.27	2.34	3.14
	4.43	4.42	4.23
	3.21	3.36	3.42
	2.42	3.98	5.94
	5.38	4.22	2.34
	5.78	3.12	3.12
	3.32	1.44	5.03
	2.39	3.39	4.92
