# Supplementary material for: 11,12 and 14,15 epoxyeicosatrienoic acid rescue deteriorated wound healing in ischemia
Source: PLoS One. 2019 Jan 16;14(1):e0209158. doi: 10.1371/journal.pone.0209158 (PMC6335021; doi:10.1371/journal.pone.0209158)
Supplement: S5 Table — (XLSX) [file pone.0209158.s005.xlsx]

## Sheet: Tabelle1
TGF-β
	d3	d6	d9
control	2.12	5.87	3.13				d3	d6	d9
	3.18	4.37	1.05		control	mean value	2.37143	4.0875	2.76875
	1.43	3.12	1.28			standart deviation	0.902431	1.35577	1.33221
	1.21	6.11	4.42		ischemia	mean value	3.1925	3.61375	4.3525
	2.29	3.24	3.39			standart deviation	1.50559	1.12968	1.43879
	3.78	4.42	1.41		11,12 EET	mean value	10.8112	9.82625	11.0388
	2.3	3.21	3.35			standart deviation	1.31568	0.949254	1.37958
	2.41	2.36	4.12		14,15 EET	mean value	10.6675	10.2525	10.9038
ischemia	2.13	3.13	5.17			standart deviation	1.78791	0.833354	1.66375
	4.24	5.21	3.26
	5.91	3.36	5.38				d3	d6	d9
	3.28	4.26	4.21			1 to 2	p= 1.000000	p=1.000000	p=0.526021
	4.21	4.38	1.42			2 to 3	p=0.003989	p=0.004183	p=0.013492
	1.43	1.42	4.37			2 to 4	p=0.006250	p=0.000924	p=0.016734
	2.26	3.94	5.12			1 to 3	p=0.001085	p=0.007142	p=0.000306
	2.08	3.21	5.89			1 to 4	p=0.002070	p=0.001968	p=0.000499
11,12 EET	12.93	10.04	8.38			3 to 4	p=1.000000	p=1.000000	p=0.872959
	9.39	11.12	10.21
	9.42	9.41	11.69
	10.83	8.27	12.02
	12.13	10.4	11.34
	10.08	10.84	10.41
	11.69	9.32	12.94
	10.02	9.21	11.32
14,15 EET	8.28	10.21	7.42
	9.37	11.34	12.87
	11.21	9.43	11.13
	9.18	10.39	10.24
	13.86	9.41	10.39
	10.23	10.91	12.29
	12.02	11.12	11.68
	11.19	9.21	11.21
