# Supplementary material for: 11,12 and 14,15 epoxyeicosatrienoic acid rescue deteriorated wound healing in ischemia
Source: PLoS One. 2019 Jan 16;14(1):e0209158. doi: 10.1371/journal.pone.0209158 (PMC6335021; doi:10.1371/journal.pone.0209158)
Supplement: S7 Table — (XLSX) [file pone.0209158.s007.xlsx]

## Sheet: Tabelle1
MMP9
	d3	d6	d9
control	3.23	2.02	5.43				d3	d6	d9
	5.14	4.31	4.4		control	mean value	4.985	3.92	5.82875
	5.28	4.27	6.96			standart deviation	1.47411	1.01955	1.17493
	6.23	3.32	7.03		ischemia	mean value	7.46625	7.79875	5.38875
	5.43	4.18	4.13			standart deviation	1.61624	1.86485	0.745816
	6.92	4.93	6.26		11,12 EET	mean value	9.27875	8.7425	8.28875
	2.44	5.12	5.38			standart deviation	1.7891	2.23039	2.05716
	5.21	3.21	7.04		14,15 EET	mean value	9.36125	9.65	9.165
ischemia	8.17	9.07	5.32			standart deviation	2.19166	1.4299	1.17863
	6.21	7.39	5.42
	5.04	8.32	6.13				d3	d6	d9
	6.21	9.41	6.24			1 to 2	p=0.219946	p=0.028439	p=0.787537
	9.08	10.4	5.45			2 to 3	p=0.295324	p= 0.911090	p=0.020551
	9.86	5.15	4.42			2 to 4	p=0.295324	p=0.473448	p= 0.001566
	8.02	5.44	4.21			1 to 3	p=0.002134	p=0.002931	p=0.080909
	7.14	7.21	5.92			1 to 4	p=0.002656	p=0.000243	p=0.010892
11,12 EET	11.21	6.12	9.15			3 to 4	p=0.915106	p=0.911090	p=0.787537
	8.09	10.09	10.69
	9.89	7.24	6.32
	8.22	10.86	8.4
	10.36	5.28	10.22
	11.87	10.17	6.43
	7.21	9.16	9.89
	7.38	11.02	5.21
14,15 EET	11.76	11.69	9.93
	8.14	8.21	10.12
	7.36	10.34	9.24
	8.08	9.19	8.08
	6.19	10.27	9.25
	12.02	10.92	10.96
	10.37	9.21	8.35
	10.97	7.37	7.39
