# Supplementary material for: 11,12 and 14,15 epoxyeicosatrienoic acid rescue deteriorated wound healing in ischemia
Source: PLoS One. 2019 Jan 16;14(1):e0209158. doi: 10.1371/journal.pone.0209158 (PMC6335021; doi:10.1371/journal.pone.0209158)
Supplement: S8 Table — (XLSX) [file pone.0209158.s008.xlsx]

## Sheet: Tabelle1
TIMP 1
	d3	d6	d9
control	4.36	2.23	5.18				d3	d6	d9
	5.12	3.43	3.24		control	mean value	3.2475	3.885	3.52125
	3.37	5.17	1.44			standart deviation	1.30113	1.03875	1.24367
	2.32	4.29	3.36		ischemia	mean value	2.785	4.45875	3.61125
	4.42	3.16	4.21			standart deviation	1.38262	1.5087	1.04014
	1.39	3.38	3.39		11,12 EET	mean value	4.01125	3.26875	4.8575
	2.12	4.14	2.43			standart deviation	1.32081	1.05456	1.34362
	2.88	5.28	4.92		14,15 EET	mean value	2.36625	2.5775	2.3275
ischemia	1.25	4.28	3.21			standart deviation	0.899554	0.906859	0.733305
	3.38	5.25	2.38
	4.12	4.96	4.27				d3	d6	d9
	1.42	6.13	5.23			1 to 2	p=1.000000	p=0.739028	p=0.957493
	2.34	5.19	3.96			2 to 3	p=0.404280	p=0.332799	p=0.329459
	3.41	1.38	2.24			2 to 4	p= 1.000000	p=0.023002	p=0.188222
	1.43	3.21	3.18			1 to 3	p=0.860875	p=0.739028	p=0.329459
	4.93	5.27	4.42			1 to 4	p=0.860875	p=0.165031	p=0.188222
11,12 EET	4.25	4.08	4.21			3 to 4	p=0.110084	p=0.739028	p=0.001738
	3.37	4.32	6.38
	3.21	3.27	4.32
	2.43	1.29	6.29
	5.87	3.21	5.24
	3.43	2.41	2.18
	6.12	3.14	5.35
	3.41	4.43	4.89
14,15 EET	2.12	3.92	1.34
	3.92	2.14	2.28
	3.39	1.43	3.21
	1.44	2.26	1.92
	2.37	3.03	3.14
	2.42	3.23	1.43
	1.96	3.19	2.94
	1.31	1.42	2.36
