# Supplementary material for: 11,12 and 14,15 epoxyeicosatrienoic acid rescue deteriorated wound healing in ischemia
Source: PLoS One. 2019 Jan 16;14(1):e0209158. doi: 10.1371/journal.pone.0209158 (PMC6335021; doi:10.1371/journal.pone.0209158)
Supplement: S9 Table — (XLSX) [file pone.0209158.s009.xlsx]

## Sheet: Tabelle1
SDF-1α
	d3	d6	d9
control	3.12	3.34	1.44				d3	d6	d9
	4.89	4.24	3.12		control	mean value	2.79	3.19	2.4975
	2.14	4.87	2.42			standart deviation	1.28116	1.2652	0.890967
	3.28	3.23	3.32		ischemia	mean value	4.24875	3.87	5.31
	1.92	1.41	1.43			standart deviation	1.62409	1.7935	2.17743
	4.13	1.42	2.39		11,12 EET	mean value	12.3087	11.1975	10.7775
	1.45	2.89	1.97			standart deviation	2.31971	1.61401	1.00467
	1.39	4.12	3.89		14,15 EET	mean value	12.6063	12.0187	10.9712
ischemia	2.34	1.42	8.41			standart deviation	2.48958	1.9713	1.77434
	3.15	5.12	8.34
	4.76	3.42	5.21				d3	d6	d9
	4.24	3.36	4.39			1 to 2	p = 0.729763	p = 1.000000	p = 0.300242
	6.61	5.87	3.42			2 to 3	p = 0.011022	p = 0.011013	p = 0.025209
	6.35	1.42	6.32			2 to 4	p = 0.010400	p = 0.004178	p = 0.025209
	4.12	4.44	3.23			1 to 3	p = 0.000693	p = 0.001968	p = 0.000215
	2.42	5.91	3.16			1 to 4	p = 0.000536	p = 0.000536	p = 0.000182
11,12 EET	10.31	8.43	11.94			3 to 4	p = 0.915106	p = 1.000000	p = 0.936271
	9.42	11.12	9.43
	13.86	10.43	9.78
	14.72	11.92	12.23
	15.75	13.95	10.4
	11.28	12.16	10.21
	12.81	11.34	11.34
	10.32	10.23	10.89
14,15 EET	14.15	14.67	9.43
	10.41	10.41	10.28
	15.67	11.28	12.36
	9.36	13.34	8.44
	15.87	14.43	12.11
	10.29	9.44	11.09
	12.21	10.35	13.94
	12.89	12.23	10.12
